# Supplementary material for: Reducing Campylobacter jejuni colonization in broiler chickens by in-feed supplementation with hyperimmune egg yolk antibodies
Source: PubMed Central journal article supplement (PMC6586802; doi:10.1038/s41598-019-45380-z), 2019-06-20
Supplement: 41598_2019_45380_MOESM1_ESM.pdf [file 41598_2019_45380_MOESM1_ESM.pdf]

# **Reducing *Campylobacter jejuni* colonization in broiler chickens by in-feed supplementation with hyperimmune egg yolk antibodies**

Jasmien Vandeputte<sup>a</sup>, An Martel<sup>a</sup>, Stefano Canessa<sup>a</sup>, Nathalie Van Rysselberghe<sup>a</sup>, Lieven De Zutter<sup>b</sup>, Marc Heyndrickx<sup>a,c</sup>, Freddy Haesebrouck<sup>a</sup>, Frank Pasmans<sup>a</sup> and An Garmyn<sup>a</sup>

<sup>a</sup>Department of Pathology, Bacteriology and Avian Diseases, Faculty of Veterinary Medicine, Ghent University, Salisburylaan 133, B9820 Merelbeke, Belgium

<sup>b</sup>Department of Veterinary Public Health and Food Safety, Faculty of Veterinary Medicine, Ghent University, Salisburylaan 133, B9820 Merelbeke, Belgium

<sup>c</sup>Flanders Research Institute for Agriculture, Fisheries and Food (ILVO), Technology & Food Sciences Unit, Brusselsesteenweg 370, B9090 Melle, Belgium

## **SUPPLEMENTARY NOTES**

We have developed two novel vaccines, a bacterin and subunit vaccine, and used the vaccines to protect broiler chickens against *Campylobacter* colonization by passive immunization. Posterior distributions from the statistical analysis of the *in vivo* trials' results and primers used for vaccine development can be found in the supplementary materials.

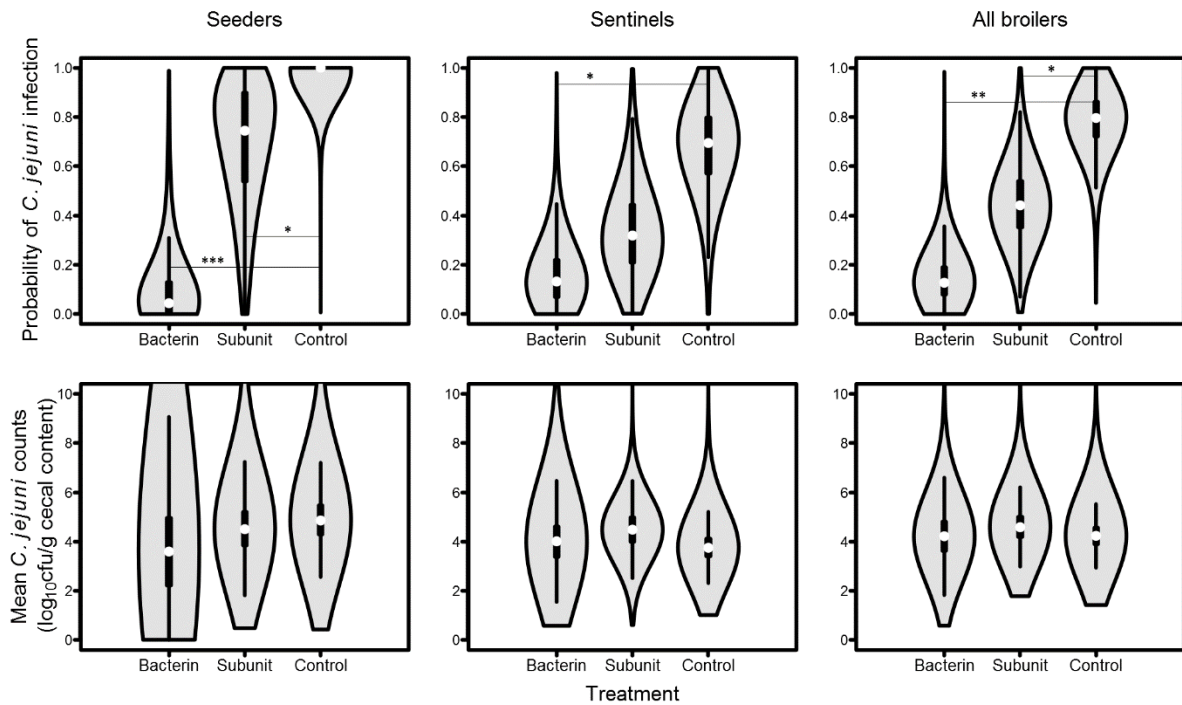

**Figure S1. Posterior distributions of the estimated probabilities of *C. jejuni* colonization (top) and mean *C. jejuni* numbers in the cecal content of colonized birds (bottom) for seeders, sentinels or all broilers after prophylactic treatment.** The distributions are visualized by a boxplot and Gauss curve. The birds received standard feed supplemented with 5% (wt/wt) egg yolk from either bacterin-immunized (Bacterin), subunit vaccine-immunized (Subunit) or sham-immunized (Control) layers, from day 1 until day 16 (the day of euthanasia). At 11 days of age, seeder birds were inoculated with approximately  $10^5$  cfu *C. jejuni* KC40.

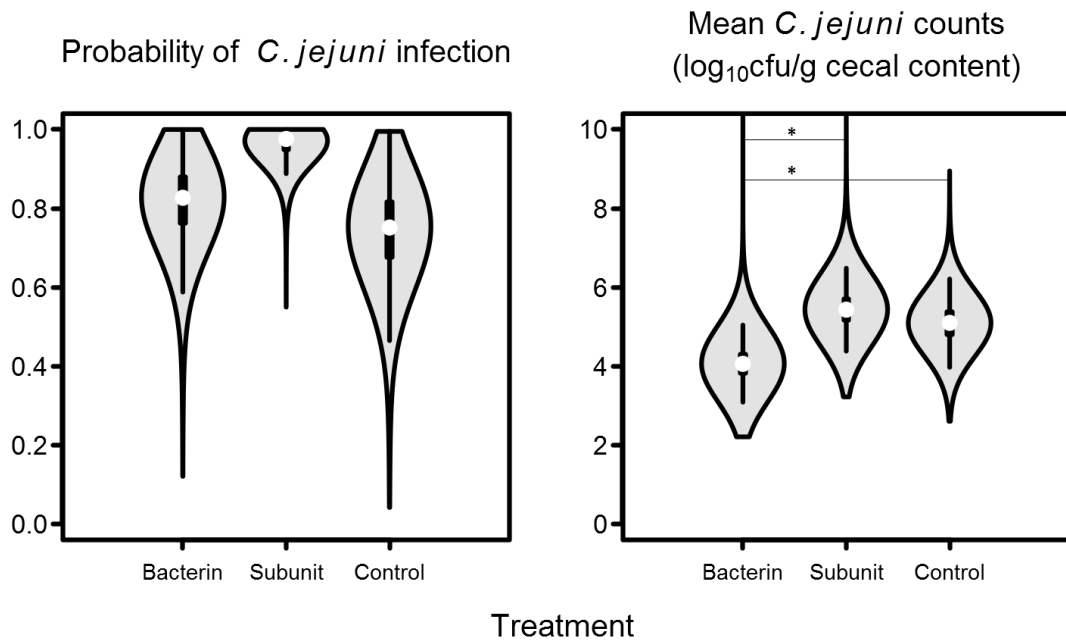

**Figure S2. Posterior distributions of the estimated probabilities of *C. jejuni* colonization (left) and mean *C. jejuni* numbers in the cecal content of colonized birds (right) after therapeutic treatment.** The distributions are visualized by a boxplot and Gauss curve. The birds received standard feed supplemented with 5% (wt/wt) egg yolk from either bacterin-immunized (Bacterin), subunit vaccine-immunized (Subunit) or sham-immunized (Control) layers, from day 19 until day 21 (the day of euthanasia). At 10 days of age, all birds were inoculated with approximately  $10^5$  cfu *C. jejuni* KC40.

**Supplementary table S1. Primers used for screening of the *Campylobacter* bacterin strains for the presence of immunodominant antigens, sequencing of the prevalent immunodominant antigens and production of blunt end PCR products of the immunodominant antigens**

| Gene fragment                        | Forward primer                | Reverse primer                 | Fragment length (bp) |
|--------------------------------------|-------------------------------|--------------------------------|----------------------|
| <b><i>AtpA</i></b>                   |                               |                                |                      |
| Presence in <i>C. jejuni</i>         | 5'-AGCTGATGAGATCAGTTC-3'      | 5'-AGCGGAGAATAAGGTGGTTG-3'     | 1271                 |
| Presence in <i>C. coli</i>           | 5'-AGCTGATGAAATCAGTTC-3'      | 5'-AGTGGAGAATAAGGAGGTTG-3'     | 1271                 |
| Sequencing fragment 1                | 5'-GAAAGCTCTTCAAATAAGC-3'     | 5'-AGACATTCGCGATAAGC-3'        | 884                  |
| Sequencing fragment 2                | 5'-GCTCCATATACTGGTGTAACC-3'   | 5'-CTTTTAGCTGC TTCTTCTGC-3'    | 925                  |
| Production of blunt end PCR products | 5'-CACCATGAAATTTAAAGC-3'      | 5'-TTATAAATGATTTGCTTTAAACTC-3' | 1505                 |
| <b><i>CheV</i></b>                   |                               |                                |                      |
| Presence in <i>C. jejuni</i>         | 5'-ATGGAGCTTGTCGATTTCCG-3'    | 5'-TTACCCCTGTTCTTGAGATTG-3'    | 915                  |
| Presence in <i>C. coli</i>           | 5'-ATGGAGCTTGTCGATTTCCG-3'    | 5'-TTACCCCTGTTCTTGAGATTG-3'    | 915                  |
| Sequencing fragment                  | 5'-TGGGTATGTGAAGGACAC-3'      | 5'-GTCGATTTGCTCAACAAGC-3'      | 1183                 |
| Production of blunt end PCR products | 5'-CACCATGTTTGATGAAAATATCG-3' | 5'-TTACCCCTGTTCTTGAGATTG-3'    | 957                  |
| <b><i>Ef-Tu</i></b>                  |                               |                                |                      |
| Presence in <i>C. jejuni</i>         | 5'-CACGTAATAAGCCACACG-3'      | 5'-ACCACCTTCACGAATAGC-3'       | 1138                 |
| Presence in <i>C. coli</i>           | 5'-CACGTAATAAGCCACATG-3'      | 5'-ACCACCTTCACGGATAGC-3'       | 1138                 |

|                                      |                                |                                |      |
|--------------------------------------|--------------------------------|--------------------------------|------|
| Sequencing fragment 1                | 5'-TTTCTGAGCGCTCGTATGGC-3'     | 5'-CCTGTAACAACAGTACCACG-3'     | 855  |
| Sequencing fragment 2                | 5'-CTCTTATGATTTCCCAGGCG-3'     | 5'-TATTGCCCTAAGGGCGCAAGC-3'    | 955  |
| Production of blunt end PCR products | 5'-CACCATGGCTAAAGAAAA-3'       | 5'-TTATTTAATAATTTTAGAAAC-3'    | 1199 |
| <b><i>GroEL</i></b>                  |                                |                                |      |
| Presence in <i>C. jejuni</i>         | 5'-CAGGCGATGGAACAACACTACTGC-3' | 5'-CCATACCGCTCATATCTGGC-3'     | 1356 |
| Presence in <i>C. coli</i>           | 5'-CAGGCGATGGAACAACACTACTGC-3' | 5'-CCATACCGCTCATATCTGGC-3'     | 1356 |
| Sequencing fragment 1                | 5'-GCTAAATACGGTGGAACAG-3'      | 5'-CGCTATATCTTCAAGCATAGC-3'    | 983  |
| Sequencing fragment 2                | 5'-CGCTGAAGATATTGAAGG-3'       | 5'-GAGGATTTGGTATAGGGC-3'       | 1047 |
| Production of blunt end PCR products | 5'-CACCATGGCAAAGAAAT-3'        | 5'-TTACATCATTCCGCCCATGC-3'     | 1637 |
| <b><i>LivJ</i></b>                   |                                |                                |      |
| Presence in <i>C. jejuni</i>         | 5'-CTTTAACTGGAACGTGGCAGC-3'    | 5'-GCATTACCGCTTTCATCTATGC-3'   | 961  |
| Presence in <i>C. coli</i>           | 5'-CATTAAACAGGACCAGTGGCTGC-3'  | 5'-GCATTACCGCTTGCATCAATGC-3'   | 961  |
| Sequencing fragment 1                | 5'-GCAGTTCTACAACAGCTTCT-3'     | 5'-TTGTTAACACCATCTCCTGC-3'     | 949  |
| Sequencing fragment 2                | 5'-GCTCCAGTGGCATCTGGAGATA-3'   | 5'-TGTCCATATGCTGCAGTAGC-3'     | 902  |
| Production of blunt end PCR products | 5'-CACCATGAAGGATATTAATATAGG-3' | 5'-TTATGGATTTATAATTGTTTTATA-3' | 1115 |
| <b><i>Tig</i></b>                    |                                |                                |      |
| Presence in <i>C. jejuni</i>         | 5'-GGCAAAGCAACTAGATTCTG-3'     | 5'-TCACAGCAGGCAAAGCTCCTTG-3'   | 1226 |

---

|                                      |                            |                              |      |
|--------------------------------------|----------------------------|------------------------------|------|
| Presence in <i>C. coli</i>           | 5'-AGCAAAGCAATTAGACTCTG-3' | 5'-TCACAGCAGGCAAAGCTCCTTG-3' | 1226 |
| Sequencing fragment 1                | 5'-AAGCCCTTCACGATTTGG-3'   | 5'-TACTGCATCTTTACCCGC-3'     | 925  |
| Sequencing fragment 2                | 5'-CGTTTTGCTACTCCTGAAGC-3' | 5'-GTCATAACTTCTTTCACCACG-3'  | 994  |
| Production of blunt end PCR products | 5'-CACCATGGAAGTAAAGGC-3'   | 5'-TTATTTATCTTCTTTCTC-3'     | 1330 |

---
